# Supplementary material
Source: PubMed Central journal article supplement (PMC3812902)

**Site-Specific Stabilization of DNA by a Tethered Major Groove Amine, 7-Aminomethyl-7-Deaza-2'-Deoxyguanosine**

Marta W. Szulik<sup>1</sup>, Markus Voehler<sup>1</sup>, Manjori Ganguly<sup>2</sup>, Barry Gold<sup>2</sup>, and Michael P. Stone<sup>1\*</sup>

**Supporting Information**

<sup>1</sup>Department of Chemistry and Center for Structural Biology  
Vanderbilt University  
Nashville, TN 37235

<sup>2</sup>Department of Pharmaceutical Sciences,  
University of Pittsburgh  
Pittsburgh, PA 15261

Corresponding Author:

\* E-mail: [Michael.p.stone@vanderbilt.edu](mailto:Michael.p.stone@vanderbilt.edu) Tel. 1-615- 322-2589

**Table of Contents**

|                                                                                                                                                                        |    |
|------------------------------------------------------------------------------------------------------------------------------------------------------------------------|----|
| <b>Table S1.</b> <sup>1</sup> H chemical shifts of the oligodeoxynucleotide non-exchangeable protons for the OL-1b duplex.                                             | 3  |
| <b>Table S2.</b> NOE distance restraints used for the OL-1b duplex structural refinement.                                                                              | 4  |
| <b>Table S3.</b> Backbone restraints generated for OL-1b duplex used in rMD caluations.                                                                                | 21 |
| <b>Table S4.</b> Deoxyribose torsion angles restraints generated for OL-1b used in rMD calculation.                                                                    | 26 |
| <b>Table S5.</b> Base pair restraints generated for OL-1b used in rMD calculation.                                                                                     | 27 |
| <b>Table S6.</b> Base pairing and base stacking helicoidal parameters of the refined structure of the 7amG containing OL-1b duplex.                                    | 29 |
| <b>Table S7.</b> Backbone torsion angles of the refined OL-1b duplex, calculated from the program Curves+ (43). Values are averaged from two symmetry-related strands. | 30 |
| <b>Figure S1.</b> Backbone torsion angles of the refined OL-1b modified duplex.                                                                                        | 31 |
| <b>Figure S2.</b> Temperature dependence of line widths of the imino                                                                                                   |    |

proton resonances of unmodified duplex OL-1a (A) and modified duplex OL-1b (B).

32

**Figure S3.** Representative time courses of transfer of solvent magnetization to the imino protons. **A.** The left panel shows base pair G<sup>3</sup>·C<sup>10</sup> in duplex OL-1a and the right panel shows base pair G<sup>3</sup>·C<sup>10</sup> in duplex OL-1b. **B.** The left panel shows base pair A<sup>4</sup>·T<sup>9</sup> in duplex OL-1a and the right panel shows base pair A<sup>4</sup>·T<sup>9</sup> in duplex OL-1b. **C.** The left panel shows base pair G<sup>5</sup>·C<sup>8</sup> in duplex OL-1a and the right panel shows base pair X<sup>5</sup>·C<sup>8</sup> in duplex aOL-1b. **D.** The left panel shows base pair C<sup>6</sup>·G<sup>7</sup> in duplex OL-1a and the right panel shows base pair C<sup>6</sup>·G<sup>7</sup> in duplex OL-1b.

33

**Table S1.**  $^1\text{H}$  chemical shifts of the oligodeoxynucleotide non-exchangeable protons for the OL-1b duplex.

| Nucleotide      | H6/<br>H8 | H2/<br>H5/<br>CH <sub>3</sub> | H1'  | H2'  | H2'' | H3'  | H4'  | H5'  | H5'' | H101 | H102 |
|-----------------|-----------|-------------------------------|------|------|------|------|------|------|------|------|------|
| G <sup>1</sup>  | 7.80      |                               | 5.49 | 2.39 | 2.59 | 4.76 | 4.18 | 4.09 | 3.61 |      |      |
| A <sup>2</sup>  | 8.13      | 7.71                          | 5.89 | 2.70 | 2.81 | 4.99 | 4.12 | 4.00 | 4.35 |      |      |
| G <sup>3</sup>  | 7.64      |                               | 5.45 | 2.52 | 2.64 | 4.94 |      | 4.14 | 4.10 |      |      |
| A <sup>4</sup>  | 8.02      | 7.73                          | 6.14 | 2.67 | 2.88 | 4.96 | 4.14 | 4.4  | 4.32 |      |      |
| X <sup>5</sup>  | 7.72      |                               | 5.49 | 2.23 | 2.21 | 4.82 |      | 4.14 |      | 3.64 | 3.47 |
| C <sup>6</sup>  | 7.25      | 5.15                          | 5.78 | 1.86 | 2.36 | 4.77 | 4.15 |      |      |      |      |
| G <sup>7</sup>  | 7.79      |                               | 5.86 | 2.59 | 2.79 | 4.91 | 4.30 | 3.97 | 4.07 |      |      |
| C <sup>8</sup>  | 7.35      | 5.34                          | 5.84 | 1.99 | 2.46 | 4.65 | 4.14 | 4.26 | 4.06 |      |      |
| T <sup>9</sup>  | 7.44      | 1.51                          | 6.06 | 2.12 | 2.25 | 4.85 | 4.06 | 4.21 |      |      |      |
| C <sup>10</sup> | 7.59      | 5.64                          | 5.97 | 2.49 | 2.49 | 4.74 |      | 4.12 |      |      |      |
| T <sup>11</sup> | 7.45      | 1.70                          | 6.07 | 2.15 | 2.24 | 4.84 |      | 4.13 |      |      |      |
| C <sup>12</sup> | 7.65      | 5.84                          | 6.24 | 2.70 | 2.48 | 4.53 | 4.13 | 3.99 | 4.17 |      |      |

**Table S2.** Summary of NOE-based distance restraints used in the rMD calculations for the OL-1b duplex.

| Nucleotide I |     | Atom I | Nucleotide II |     | Atom II | Lower bound | Upper bound |
|--------------|-----|--------|---------------|-----|---------|-------------|-------------|
| 1            | DG5 | H2''   | 1             | DG5 | H1'     | 1.89        | 2.82        |
| 1            | DG5 | H2''   | 1             | DG5 | H1'     | 2.07        | 3.23        |
| 1            | DG5 | H3'    | 1             | DG5 | H1'     | 2.06        | 3.04        |
| 1            | DG5 | H3'    | 1             | DG5 | H2''    | 2.36        | 3.94        |
| 1            | DG5 | H3'    | 1             | DG5 | H2'     | 1.74        | 2.58        |
| 1            | DG5 | H8     | 1             | DG5 | H1'     | 2.56        | 4.32        |
| 1            | DG5 | H8     | 1             | DG5 | H2'     | 1.70        | 3.10        |
| 1            | DG5 | H8     | 1             | DG5 | H3'     | 3.33        | 5.62        |
| 2            | DA  | H2''   | 2             | DA  | H1'     | 2.10        | 2.40        |
| 2            | DA  | H2'    | 2             | DA  | H1'     | 2.23        | 2.93        |
| 2            | DA  | H3'    | 2             | DA  | H1'     | 2.76        | 3.98        |
| 2            | DA  | H3'    | 2             | DA  | H2''    | 2.23        | 2.90        |
| 2            | DA  | H3'    | 2             | DA  | H2'     | 2.66        | 3.73        |
| 2            | DA  | H8     | 1             | DG5 | H1'     | 3.13        | 3.81        |
| 2            | DA  | H8     | 1             | DG5 | H2''    | 2.47        | 3.14        |
| 2            | DA  | H8     | 1             | DG5 | H2'     | 2.66        | 3.89        |
| 2            | DA  | H8     | 1             | DG5 | H3'     | 3.52        | 6.6         |
| 2            | DA  | H8     | 1             | DG5 | H8      | 4.62        | 6.29        |
| 2            | DA  | H8     | 2             | DA  | H1'     | 2.54        | 3.47        |
| 2            | DA  | H8     | 2             | DA  | H2''    | 2.21        | 2.93        |
| 2            | DA  | H8     | 2             | DA  | H2'     | 2.56        | 3.52        |
| 2            | DA  | H8     | 2             | DA  | H3'     | 3.08        | 3.81        |
| 2            | DA  | H2     | 2             | DA  | H1'     | 3.58        | 4.69        |

|   |    |      |   |    |      |      |      |
|---|----|------|---|----|------|------|------|
| 3 | DG | H1'  | 2 | DA | H2   | 3.78 | 4.92 |
| 3 | DG | H2'' | 3 | DG | H1'  | 3.16 | 5.34 |
| 3 | DG | H2'  | 3 | DG | H1'  | 2.04 | 3.10 |
| 3 | DG | H3'  | 2 | DA | H2'' | 2.91 | 5.43 |
| 3 | DG | H3'  | 3 | DG | H1'  | 2.54 | 3.54 |
| 3 | DG | H3'  | 3 | DG | H2'' | 2.10 | 2.69 |
| 3 | DG | H3'  | 3 | DG | H2'  | 2.16 | 2.64 |
| 3 | DG | H8   | 2 | DA | H1'  | 1.99 | 2.67 |
| 3 | DG | H8   | 2 | DA | H2'' | 2.78 | 5.84 |
| 3 | DG | H8   | 2 | DA | H2'  | 1.88 | 2.63 |
| 3 | DG | H8   | 2 | DA | H8   | 3.98 | 6.42 |
| 3 | DG | H8   | 3 | DG | H1'  | 2.84 | 4.75 |
| 3 | DG | H8   | 3 | DG | H2'' | 2.84 | 5.09 |
| 3 | DG | H8   | 3 | DG | H2'  | 1.63 | 2.37 |
| 3 | DG | H8   | 3 | DG | H3'  | 2.08 | 2.95 |
| 4 | DA | H2'' | 4 | DA | H1'  | 1.70 | 2.38 |
| 4 | DA | H2'  | 4 | DA | H1'  | 2.29 | 3.17 |
| 4 | DA | H3'  | 4 | DA | H1'  | 3.57 | 5.77 |
| 4 | DA | H3'  | 4 | DA | H2'' | 2.03 | 2.75 |
| 4 | DA | H3'  | 4 | DA | H2'  | 2.40 | 3.31 |
| 4 | DA | H8   | 3 | DG | H1'  | 2.72 | 4.04 |
| 4 | DA | H8   | 3 | DG | H2'' | 2.93 | 4.11 |
| 4 | DA | H8   | 3 | DG | H2'  | 1.64 | 2.23 |
| 4 | DA | H8   | 3 | DG | H8   | 2.22 | 4.27 |
| 4 | DA | H8   | 4 | DA | H1'  | 2.71 | 4.21 |
| 4 | DA | H8   | 4 | DA | H2'' | 2.02 | 3.04 |
| 4 | DA | H8   | 4 | DA | H2'  | 2.54 | 3.56 |

|   |     |      |   |     |      |      |      |
|---|-----|------|---|-----|------|------|------|
| 4 | DA  | H8   | 4 | DA  | H3'  | 2.75 | 3.47 |
| 4 | DA  | H2   | 4 | DA  | H1'  | 3.66 | 5.04 |
| 5 | AMG | H101 | 4 | DA  | H2'' | 1.83 | 2.48 |
| 5 | AMG | H101 | 4 | DA  | H2'  | 2.11 | 2.68 |
| 5 | AMG | H101 | 4 | DA  | H3'  | 2.92 | 5.40 |
| 5 | AMG | H101 | 4 | DA  | H8   | 2.29 | 4.08 |
| 5 | AMG | H102 | 4 | DA  | H2'  | 2.19 | 2.42 |
| 5 | AMG | H102 | 4 | DA  | H2'' | 1.58 | 2.98 |
| 5 | AMG | H102 | 4 | DA  | H3'  | 3.07 | 6.23 |
| 5 | AMG | H102 | 4 | DA  | H8   | 2.49 | 4.48 |
| 5 | AMG | H1'  | 4 | DA  | H2   | 3.70 | 5.21 |
| 5 | AMG | H2'  | 4 | DA  | H2'' | 2.10 | 5.82 |
| 5 | AMG | H2'  | 5 | AMG | H1'  | 2.13 | 3.03 |
| 5 | AMG | H3'  | 4 | DA  | H1'  | 3.43 | 5.16 |
| 5 | AMG | H3'  | 4 | DA  | H2'' | 2.24 | 3.03 |
| 5 | AMG | H3'  | 5 | AMG | H1'  | 2.11 | 2.87 |
| 5 | AMG | H3'  | 5 | AMG | H2'  | 1.77 | 2.26 |
| 5 | AMG | H8   | 4 | DA  | H1'  | 3.58 | 5.80 |
| 5 | AMG | H8   | 4 | DA  | H2'' | 2.19 | 4.64 |
| 5 | AMG | H8   | 4 | DA  | H2'  | 2.83 | 4.00 |
| 5 | AMG | H8   | 4 | DA  | H3'  | 3.89 | 6.12 |
| 5 | AMG | H8   | 4 | DA  | H8   | 3.50 | 5.84 |
| 5 | AMG | H8   | 5 | AMG | H101 | 2.99 | 5.63 |
| 5 | AMG | H8   | 5 | AMG | H102 | 2.61 | 5.45 |
| 5 | AMG | H8   | 5 | AMG | H1'  | 2.90 | 4.58 |
| 5 | AMG | H8   | 5 | AMG | H2'  | 2.10 | 3.34 |
| 5 | AMG | H8   | 5 | AMG | H3'  | 2.56 | 3.87 |

|   |    |      |   |     |      |      |      |
|---|----|------|---|-----|------|------|------|
| 6 | DC | H2'' | 6 | DC  | H1'  | 1.96 | 2.65 |
| 6 | DC | H2'  | 5 | AMG | H1'  | 3.47 | 5.23 |
| 6 | DC | H2'  | 6 | DC  | H1'  | 2.51 | 3.77 |
| 6 | DC | H3'  | 6 | DC  | H1'  | 3.48 | 5.53 |
| 6 | DC | H3'  | 6 | DC  | H2'  | 2.36 | 2.99 |
| 6 | DC | H6   | 5 | AMG | H1'  | 3.06 | 4.56 |
| 6 | DC | H6   | 5 | AMG | H2'  | 2.66 | 3.40 |
| 6 | DC | H6   | 5 | AMG | H8   | 4.23 | 5.91 |
| 6 | DC | H6   | 6 | DC  | H1'  | 3.06 | 4.16 |
| 6 | DC | H6   | 6 | DC  | H2'' | 2.76 | 4.20 |
| 6 | DC | H6   | 6 | DC  | H2'  | 2.20 | 2.63 |
| 6 | DC | H6   | 6 | DC  | H3'  | 2.91 | 4.17 |
| 6 | DC | H5   | 5 | AMG | H1'  | 2.98 | 4.06 |
| 6 | DC | H5   | 5 | AMG | H2'  | 2.48 | 3.31 |
| 6 | DC | H5   | 5 | AMG | H3'  | 3.63 | 5.44 |
| 6 | DC | H5   | 5 | AMG | H8   | 3.57 | 4.56 |
| 6 | DC | H5   | 6 | DC  | H2'' | 3.66 | 6.16 |
| 6 | DC | H5   | 6 | DC  | H2'  | 3.18 | 4.40 |
| 7 | DG | H2'' | 7 | DG  | H1'  | 1.90 | 2.82 |
| 7 | DG | H2'  | 7 | DG  | H1'  | 1.96 | 2.79 |
| 7 | DG | H3'  | 6 | DC  | H2'' | 2.22 | 4.47 |
| 7 | DG | H3'  | 7 | DG  | H1'  | 1.62 | 2.10 |
| 7 | DG | H3'  | 7 | DG  | H2'' | 2.09 | 3.94 |
| 7 | DG | H3'  | 7 | DG  | H2'  | 1.96 | 3.78 |
| 7 | DG | H8   | 6 | DC  | H1'  | 2.27 | 3.13 |
| 7 | DG | H8   | 6 | DC  | H2'' | 1.69 | 2.38 |
| 7 | DG | H8   | 6 | DC  | H2'  | 2.42 | 5.27 |



|   |    |      |   |    |      |      |      |
|---|----|------|---|----|------|------|------|
| 7 | DG | H8   | 6 | DC | H6   | 2.86 | 4.35 |
| 7 | DG | H8   | 7 | DG | H1'  | 2.03 | 3.54 |
| 7 | DG | H8   | 7 | DG | H2'' | 2.07 | 4.05 |
| 7 | DG | H8   | 7 | DG | H2'  | 2.28 | 4.75 |
| 7 | DG | H8   | 7 | DG | H3'  | 2.03 | 3.15 |
| 8 | DC | H2'' | 8 | DC | H1'  | 1.68 | 2.37 |
| 8 | DC | H2'  | 8 | DC | H1'  | 2.28 | 4.06 |
| 8 | DC | H3'  | 8 | DC | H1'  | 2.95 | 5.04 |
| 8 | DC | H3'  | 8 | DC | H2'' | 2.48 | 4.64 |
| 8 | DC | H3'  | 8 | DC | H2'  | 2.11 | 2.87 |
| 8 | DC | H6   | 7 | DG | H1'  | 2.32 | 3.14 |
| 8 | DC | H6   | 7 | DG | H2'' | 2.43 | 4.92 |
| 8 | DC | H6   | 7 | DG | H2'  | 2.10 | 4.11 |
| 8 | DC | H6   | 7 | DG | H3'  | 2.68 | 4.30 |
| 8 | DC | H6   | 7 | DG | H8   | 2.78 | 4.32 |
| 8 | DC | H6   | 8 | DC | H2'' | 2.75 | 4.37 |
| 8 | DC | H6   | 8 | DC | H2'  | 2.17 | 2.78 |
| 8 | DC | H6   | 8 | DC | H3'  | 3.10 | 4.02 |
| 8 | DC | H5   | 7 | DG | H1'  | 2.85 | 3.70 |
| 8 | DC | H5   | 7 | DG | H2'' | 2.60 | 5.47 |
| 8 | DC | H5   | 7 | DG | H2'  | 2.50 | 4.59 |
| 8 | DC | H5   | 7 | DG | H3'  | 2.87 | 4.01 |
| 8 | DC | H5   | 7 | DG | H8   | 3.08 | 3.84 |
| 8 | DC | H5   | 8 | DC | H2'' | 3.81 | 5.91 |
| 8 | DC | H5   | 8 | DC | H2'  | 3.36 | 4.46 |
| 8 | DC | H5   | 8 | DC | H3'  | 4.79 | 6.91 |
| 9 | DT | H1'  | 8 | DC | H1'  | 3.00 | 4.99 |

|    |    |      |    |    |      |      |      |
|----|----|------|----|----|------|------|------|
| 9  | DT | H2'' | 9  | DT | H1'  | 1.73 | 2.30 |
| 9  | DT | H2'  | 9  | DT | H1'  | 2.42 | 4.87 |
| 9  | DT | H3'  | 9  | DT | H1'  | 1.80 | 2.40 |
| 9  | DT | H3'  | 9  | DT | H2'' | 2.16 | 3.31 |
| 9  | DT | H3'  | 9  | DT | H2'  | 2.03 | 2.57 |
| 9  | DT | H6   | 8  | DC | H1'  | 2.97 | 6.01 |
| 9  | DT | H6   | 8  | DC | H2'  | 2.53 | 4.13 |
| 9  | DT | H6   | 8  | DC | H3'  | 3.51 | 5.01 |
| 9  | DT | H6   | 8  | DC | H6   | 3.17 | 5.10 |
| 9  | DT | H6   | 9  | DT | H2'  | 2.09 | 3.13 |
| 9  | DT | ME   | 8  | DC | H1'  | 2.84 | 5.00 |
| 9  | DT | ME   | 8  | DC | H2'' | 2.98 | 4.11 |
| 9  | DT | ME   | 8  | DC | H2'  | 2.96 | 4.04 |
| 9  | DT | ME   | 8  | DC | H3'  | 3.39 | 4.29 |
| 9  | DT | ME   | 8  | DC | H6   | 2.85 | 3.74 |
| 9  | DT | ME   | 8  | DC | H5   | 2.97 | 3.68 |
| 9  | DT | ME   | 9  | DT | H1'  | 3.33 | 5.85 |
| 9  | DT | ME   | 9  | DT | H2'' | 3.16 | 6.01 |
| 9  | DT | ME   | 9  | DT | H2'  | 3.30 | 5.08 |
| 9  | DT | ME   | 9  | DT | H3'  | 3.70 | 5.88 |
| 9  | DT | ME   | 9  | DT | H6   | 2.70 | 3.34 |
| 10 | DC | H2'' | 10 | DC | H1'  | 1.63 | 2.19 |
| 10 | DC | H2'  | 10 | DC | H1'  | 2.28 | 3.86 |
| 10 | DC | H3'  | 9  | DT | H1'  | 2.88 | 5.40 |
| 10 | DC | H3'  | 10 | DC | H1'  | 3.33 | 5.52 |
| 10 | DC | H3'  | 10 | DC | H2'' | 2.16 | 3.72 |
| 10 | DC | H3'  | 10 | DC | H2'  | 2.07 | 2.63 |

|    |    |      |    |    |      |      |      |
|----|----|------|----|----|------|------|------|
| 10 | DC | H6   | 9  | DT | H1'  | 2.29 | 4.09 |
| 10 | DC | H6   | 9  | DT | H2'' | 1.90 | 2.89 |
| 10 | DC | H6   | 9  | DT | H2'  | 3.10 | 5.10 |
| 10 | DC | H6   | 9  | DT | H3'  | 2.70 | 5.89 |
| 10 | DC | H6   | 9  | DT | H6   | 2.45 | 3.61 |
| 10 | DC | H6   | 10 | DC | H1'  | 2.86 | 4.39 |
| 10 | DC | H6   | 10 | DC | H2'  | 1.90 | 2.38 |
| 10 | DC | H6   | 10 | DC | H3'  | 2.97 | 5.84 |
| 10 | DC | H5   | 9  | DT | H1'  | 3.02 | 5.31 |
| 10 | DC | H5   | 9  | DT | H2'' | 2.57 | 3.66 |
| 10 | DC | H5   | 9  | DT | H2'  | 2.81 | 4.45 |
| 10 | DC | H5   | 9  | DT | H3'  | 3.10 | 4.06 |
| 10 | DC | H5   | 9  | DT | H6   | 3.07 | 3.65 |
| 10 | DC | H5   | 9  | DT | ME   | 3.27 | 3.99 |
| 10 | DC | H5   | 10 | DC | H1'  | 3.36 | 5.49 |
| 10 | DC | H5   | 10 | DC | H2'  | 2.92 | 4.98 |
| 10 | DC | H5   | 10 | DC | H3'  | 3.47 | 4.55 |
| 11 | DT | H2'' | 11 | DT | H1'  | 1.79 | 2.48 |
| 11 | DT | H2'  | 11 | DT | H1'  | 2.46 | 4.19 |
| 11 | DT | H3'  | 10 | DC | H1'  | 2.97 | 5.45 |
| 11 | DT | H3'  | 11 | DT | H1'  | 2.27 | 4.22 |
| 11 | DT | H3'  | 11 | DT | H2'' | 2.15 | 2.68 |
| 11 | DT | H3'  | 11 | DT | H2'  | 1.94 | 2.46 |
| 11 | DT | H6   | 10 | DC | H1'  | 2.44 | 3.46 |
| 11 | DT | H6   | 10 | DC | H3'  | 3.06 | 3.96 |
| 11 | DT | H6   | 11 | DT | H1'  | 2.01 | 3.21 |
| 11 | DT | H6   | 11 | DT | H2'' | 1.87 | 2.50 |

|    |     |      |    |     |      |      |      |
|----|-----|------|----|-----|------|------|------|
| 11 | DT  | H6   | 11 | DT  | H2'  | 2.27 | 3.12 |
| 11 | DT  | H6   | 11 | DT  | H3'  | 2.00 | 2.69 |
| 11 | DT  | ME   | 10 | DC  | H1'  | 3.34 | 4.68 |
| 11 | DT  | ME   | 10 | DC  | H3'  | 3.74 | 5.51 |
| 11 | DT  | ME   | 10 | DC  | H6   | 3.05 | 3.52 |
| 11 | DT  | ME   | 10 | DC  | H5   | 2.82 | 3.53 |
| 11 | DT  | ME   | 11 | DT  | H1'  | 2.98 | 5.15 |
| 11 | DT  | ME   | 11 | DT  | H2'' | 2.65 | 4.92 |
| 11 | DT  | ME   | 11 | DT  | H2'  | 3.40 | 6.27 |
| 11 | DT  | ME   | 11 | DT  | H3'  | 3.12 | 4.92 |
| 11 | DT  | ME   | 11 | DT  | H6   | 2.44 | 2.87 |
| 12 | DC3 | H2'  | 12 | DC3 | H1'  | 1.74 | 2.35 |
| 12 | DC3 | H3'  | 12 | DC3 | H2'  | 1.87 | 2.41 |
| 12 | DC3 | H6   | 11 | DT  | H1'  | 2.8  | 5.35 |
| 12 | DC3 | H6   | 11 | DT  | H2'  | 2.19 | 3.35 |
| 12 | DC3 | H6   | 11 | DT  | H3'  | 1.96 | 2.46 |
| 12 | DC3 | H6   | 11 | DT  | H6   | 2.21 | 3.34 |
| 12 | DC3 | H6   | 12 | DC3 | H1'  | 3.16 | 4.91 |
| 12 | DC3 | H6   | 12 | DC3 | H2'  | 1.78 | 2.40 |
| 12 | DC3 | H6   | 12 | DC3 | H3'  | 2.48 | 3.08 |
| 12 | DC3 | H5   | 11 | DT  | H2'  | 2.48 | 3.24 |
| 12 | DC3 | H5   | 11 | DT  | H3'  | 3.21 | 5.59 |
| 12 | DC3 | H5   | 11 | DT  | ME   | 3.52 | 5.06 |
| 12 | DC3 | H5   | 12 | DC3 | H1'  | 3.18 | 6.10 |
| 12 | DC3 | H5   | 12 | DC3 | H2'  | 2.85 | 5.14 |
| 12 | DC3 | H5   | 12 | DC3 | H3'  | 3.63 | 5.75 |
| 13 | DG5 | H2'' | 13 | DG5 | H1'  | 1.84 | 2.65 |

|    |     |      |    |     |      |      |      |
|----|-----|------|----|-----|------|------|------|
| 13 | DG5 | H2'  | 13 | DG5 | H1'  | 2.12 | 3.46 |
| 13 | DG5 | H3'  | 13 | DG5 | H1'  | 2.13 | 3.41 |
| 13 | DG5 | H3'  | 13 | DG5 | H2'' | 2.35 | 4.26 |
| 13 | DG5 | H3'  | 13 | DG5 | H2'  | 1.72 | 2.41 |
| 13 | DG5 | H8   | 13 | DG5 | H1'  | 2.69 | 5.12 |
| 13 | DG5 | H8   | 13 | DG5 | H2'  | 1.72 | 3.14 |
| 13 | DG5 | H8   | 13 | DG5 | H3'  | 3.29 | 4.85 |
| 14 | DA  | H2'' | 14 | DA  | H1'  | 2.09 | 2.40 |
| 14 | DA  | H2'  | 14 | DA  | H1'  | 2.20 | 2.91 |
| 14 | DA  | H3'  | 14 | DA  | H1'  | 2.79 | 3.97 |
| 14 | DA  | H3'  | 14 | DA  | H2'' | 2.21 | 2.91 |
| 14 | DA  | H3'  | 14 | DA  | H2'  | 2.74 | 3.69 |
| 14 | DA  | H8   | 13 | DG5 | H1'  | 3.07 | 4.67 |
| 14 | DA  | H8   | 13 | DG5 | H2'' | 2.48 | 3.45 |
| 14 | DA  | H8   | 13 | DG5 | H2'  | 2.62 | 3.77 |
| 14 | DA  | H8   | 13 | DG5 | H3'  | 3.49 | 6.67 |
| 14 | DA  | H8   | 13 | DG5 | H8   | 4.24 | 6.60 |
| 14 | DA  | H8   | 14 | DA  | H1'  | 2.57 | 3.50 |
| 14 | DA  | H8   | 14 | DA  | H2'' | 2.22 | 2.99 |
| 14 | DA  | H8   | 14 | DA  | H2'  | 2.53 | 3.51 |
| 14 | DA  | H8   | 14 | DA  | H3'  | 3.10 | 3.99 |
| 14 | DA  | H2   | 11 | DT  | H1'  | 3.81 | 5.56 |
| 14 | DA  | H2   | 12 | DC3 | H1'  | 3.84 | 5.40 |
| 14 | DA  | H2   | 14 | DA  | H1'  | 3.43 | 4.82 |
| 15 | DG  | H1'  | 14 | DA  | H2   | 3.74 | 5.06 |
| 15 | DG  | H2'' | 15 | DG  | H1'  | 3.11 | 5.18 |
| 15 | DG  | H2'  | 15 | DG  | H1'  | 2.07 | 2.85 |

|    |    |      |    |    |      |      |      |
|----|----|------|----|----|------|------|------|
| 15 | DG | H3'  | 14 | DA | H2'' | 3.10 | 5.54 |
| 15 | DG | H3'  | 15 | DG | H1'  | 2.49 | 3.50 |
| 15 | DG | H3'  | 15 | DG | H2'' | 2.08 | 2.68 |
| 15 | DG | H3'  | 15 | DG | H2'  | 2.17 | 2.73 |
| 15 | DG | H8   | 14 | DA | H1'  | 1.95 | 2.61 |
| 15 | DG | H8   | 14 | DA | H2'' | 2.70 | 5.85 |
| 15 | DG | H8   | 14 | DA | H2'  | 1.95 | 2.59 |
| 15 | DG | H8   | 14 | DA | H8   | 3.86 | 5.60 |
| 15 | DG | H8   | 15 | DG | H1'  | 2.61 | 4.50 |
| 15 | DG | H8   | 15 | DG | H2'' | 2.73 | 4.76 |
| 15 | DG | H8   | 15 | DG | H2'  | 1.72 | 2.31 |
| 15 | DG | H8   | 15 | DG | H3'  | 2.02 | 3.04 |
| 16 | DA | H2'' | 16 | DA | H1'  | 1.70 | 2.35 |
| 16 | DA | H2'  | 16 | DA | H1'  | 2.21 | 3.13 |
| 16 | DA | H3'  | 16 | DA | H1'  | 3.73 | 5.59 |
| 16 | DA | H3'  | 16 | DA | H2'' | 2.07 | 2.71 |
| 16 | DA | H3'  | 16 | DA | H2'  | 2.32 | 3.22 |
| 16 | DA | H8   | 15 | DG | H1'  | 2.69 | 4.49 |
| 16 | DA | H8   | 15 | DG | H2'' | 2.90 | 4.06 |
| 16 | DA | H8   | 15 | DG | H2'  | 1.75 | 2.29 |
| 16 | DA | H8   | 15 | DG | H8   | 2.23 | 4.19 |
| 16 | DA | H8   | 16 | DA | H1'  | 2.78 | 5.10 |
| 16 | DA | H8   | 16 | DA | H2'' | 2.05 | 2.89 |
| 16 | DA | H8   | 16 | DA | H2'  | 2.45 | 3.51 |
| 16 | DA | H8   | 16 | DA | H3'  | 2.77 | 3.57 |
| 16 | DA | H2   | 9  | DT | H1'  | 3.73 | 5.46 |
| 16 | DA | H2   | 10 | DC | H1'  | 3.07 | 4.01 |

|    |     |      |    |     |      |      |      |
|----|-----|------|----|-----|------|------|------|
| 16 | DA  | H2   | 16 | DA  | H1'  | 3.59 | 5.10 |
| 17 | AMG | H101 | 16 | DA  | H2'' | 1.84 | 2.49 |
| 17 | AMG | H101 | 16 | DA  | H2'  | 2.08 | 2.67 |
| 17 | AMG | H101 | 16 | DA  | H3'  | 2.89 | 5.29 |
| 17 | AMG | H101 | 16 | DA  | H8   | 2.46 | 3.79 |
| 17 | AMG | H102 | 16 | DA  | H2'  | 2.18 | 2.41 |
| 17 | AMG | H102 | 16 | DA  | H2'' | 1.58 | 2.98 |
| 17 | AMG | H102 | 16 | DA  | H3'  | 3.18 | 6.08 |
| 17 | AMG | H102 | 16 | DA  | H8   | 2.45 | 4.04 |
| 17 | AMG | H1'  | 16 | DA  | H2   | 3.69 | 4.88 |
| 17 | AMG | H2'  | 16 | DA  | H2'' | 2.04 | 5.47 |
| 17 | AMG | H2'  | 17 | AMG | H1'  | 2.14 | 2.90 |
| 17 | AMG | H3'  | 16 | DA  | H1'  | 3.57 | 5.40 |
| 17 | AMG | H3'  | 16 | DA  | H2'' | 2.32 | 3.09 |
| 17 | AMG | H3'  | 17 | AMG | H1'  | 2.09 | 2.72 |
| 17 | AMG | H3'  | 17 | AMG | H2'  | 1.76 | 2.30 |
| 17 | AMG | H8   | 16 | DA  | H1'  | 3.46 | 5.16 |
| 17 | AMG | H8   | 16 | DA  | H2'' | 2.16 | 4.39 |
| 17 | AMG | H8   | 16 | DA  | H2'  | 2.75 | 4.15 |
| 17 | AMG | H8   | 16 | DA  | H3'  | 3.77 | 6.15 |
| 17 | AMG | H8   | 16 | DA  | H8   | 3.55 | 6.12 |
| 17 | AMG | H8   | 17 | AMG | H101 | 2.88 | 5.64 |
| 17 | AMG | H8   | 17 | AMG | H102 | 2.61 | 5.50 |
| 17 | AMG | H8   | 17 | AMG | H1'  | 3.03 | 4.73 |
| 17 | AMG | H8   | 17 | AMG | H2'  | 2.12 | 3.31 |
| 17 | AMG | H8   | 17 | AMG | H3'  | 2.55 | 3.86 |
| 18 | DC  | H2'' | 18 | DC  | H1'  | 1.98 | 2.71 |

|    |    |      |    |     |      |      |      |
|----|----|------|----|-----|------|------|------|
| 18 | DC | H2'  | 17 | AMG | H1'  | 2.97 | 5.25 |
| 18 | DC | H2'  | 18 | DC  | H1'  | 2.48 | 3.45 |
| 18 | DC | H3'  | 18 | DC  | H1'  | 3.47 | 5.20 |
| 18 | DC | H3'  | 18 | DC  | H2'  | 2.34 | 3.02 |
| 18 | DC | H6   | 17 | AMG | H1'  | 3.05 | 4.22 |
| 18 | DC | H6   | 17 | AMG | H2'  | 2.60 | 3.41 |
| 18 | DC | H6   | 17 | AMG | H8   | 3.96 | 6.16 |
| 18 | DC | H6   | 18 | DC  | H1'  | 3.16 | 3.97 |
| 18 | DC | H6   | 18 | DC  | H2'' | 2.80 | 5.15 |
| 18 | DC | H6   | 18 | DC  | H2'  | 2.21 | 2.61 |
| 18 | DC | H6   | 18 | DC  | H3'  | 2.91 | 4.17 |
| 18 | DC | H5   | 17 | AMG | H1'  | 3.04 | 3.99 |
| 18 | DC | H5   | 17 | AMG | H2'  | 2.38 | 3.44 |
| 18 | DC | H5   | 17 | AMG | H3'  | 3.57 | 5.56 |
| 18 | DC | H5   | 17 | AMG | H8   | 3.50 | 4.65 |
| 18 | DC | H5   | 18 | DC  | H2'' | 3.58 | 6.46 |
| 18 | DC | H5   | 18 | DC  | H2'  | 3.09 | 4.25 |
| 19 | DG | H2'' | 19 | DG  | H1'  | 1.97 | 3.38 |
| 19 | DG | H2'  | 19 | DG  | H1'  | 1.96 | 2.85 |
| 19 | DG | H3'  | 18 | DC  | H2'' | 2.30 | 4.22 |
| 19 | DG | H3'  | 19 | DG  | H1'  | 1.63 | 2.09 |
| 19 | DG | H3'  | 19 | DG  | H2'' | 2.14 | 3.44 |
| 19 | DG | H3'  | 19 | DG  | H2'  | 1.95 | 3.99 |
| 19 | DG | H8   | 18 | DC  | H1'  | 2.26 | 3.12 |
| 19 | DG | H8   | 18 | DC  | H2'' | 1.61 | 2.33 |
| 19 | DG | H8   | 18 | DC  | H2'  | 2.55 | 5.23 |
| 19 | DG | H8   | 18 | DC  | H6   | 2.89 | 4.41 |



|    |    |      |    |    |      |      |      |
|----|----|------|----|----|------|------|------|
| 19 | DG | H8   | 19 | DG | H1'  | 1.96 | 3.55 |
| 19 | DG | H8   | 19 | DG | H2'' | 2.06 | 4.33 |
| 19 | DG | H8   | 19 | DG | H2'  | 2.48 | 5.17 |
| 19 | DG | H8   | 19 | DG | H3'  | 2.00 | 3.02 |
| 20 | DC | H2'' | 20 | DC | H1'  | 1.65 | 2.33 |
| 20 | DC | H2'  | 20 | DC | H1'  | 2.42 | 4.06 |
| 20 | DC | H3'  | 20 | DC | H1'  | 3.03 | 4.71 |
| 20 | DC | H3'  | 20 | DC | H2'' | 2.47 | 4.86 |
| 20 | DC | H3'  | 20 | DC | H2'  | 2.23 | 2.78 |
| 20 | DC | H6   | 19 | DG | H1'  | 2.33 | 3.13 |
| 20 | DC | H6   | 19 | DG | H2'' | 2.44 | 4.61 |
| 20 | DC | H6   | 19 | DG | H2'  | 2.15 | 3.85 |
| 20 | DC | H6   | 19 | DG | H3'  | 2.66 | 4.62 |
| 20 | DC | H6   | 19 | DG | H8   | 2.77 | 4.55 |
| 20 | DC | H6   | 20 | DC | H2'' | 2.84 | 4.77 |
| 20 | DC | H6   | 20 | DC | H2'  | 2.24 | 2.81 |
| 20 | DC | H6   | 20 | DC | H3'  | 3.08 | 3.85 |
| 20 | DC | H5   | 19 | DG | H1'  | 2.80 | 3.70 |
| 20 | DC | H5   | 19 | DG | H2'' | 2.68 | 5.63 |
| 20 | DC | H5   | 19 | DG | H2'  | 2.57 | 4.25 |
| 20 | DC | H5   | 19 | DG | H3'  | 2.89 | 3.94 |
| 20 | DC | H5   | 19 | DG | H8   | 3.02 | 3.84 |
| 20 | DC | H5   | 20 | DC | H2'' | 3.29 | 5.70 |
| 20 | DC | H5   | 20 | DC | H2'  | 3.37 | 5.06 |
| 20 | DC | H5   | 20 | DC | H3'  | 4.59 | 6.70 |
| 21 | DT | H1'  | 4  | DA | H2   | 3.88 | 5.49 |
| 21 | DT | H1'  | 20 | DC | H1'  | 2.97 | 5.64 |

|    |    |      |    |    |      |      |      |
|----|----|------|----|----|------|------|------|
| 21 | DT | H2'' | 21 | DT | H1'  | 1.78 | 2.33 |
| 21 | DT | H2'  | 21 | DT | H1'  | 2.69 | 4.12 |
| 21 | DT | H3'  | 21 | DT | H1'  | 1.84 | 2.53 |
| 21 | DT | H3'  | 21 | DT | H2'' | 2.12 | 3.37 |
| 21 | DT | H3'  | 21 | DT | H2'  | 2.04 | 2.56 |
| 21 | DT | H6   | 20 | DC | H1'  | 2.75 | 5.28 |
| 21 | DT | H6   | 20 | DC | H2'  | 2.60 | 4.42 |
| 21 | DT | H6   | 20 | DC | H3'  | 3.54 | 5.14 |
| 21 | DT | H6   | 20 | DC | H6   | 3.21 | 5.00 |
| 21 | DT | H6   | 21 | DT | H2'  | 2.05 | 3.06 |
| 21 | DT | ME   | 20 | DC | H1'  | 2.83 | 5.36 |
| 21 | DT | ME   | 20 | DC | H2'' | 3.33 | 4.54 |
| 21 | DT | ME   | 20 | DC | H2'  | 2.95 | 4.77 |
| 21 | DT | ME   | 20 | DC | H3'  | 3.41 | 4.03 |
| 21 | DT | ME   | 20 | DC | H6   | 3.16 | 6.16 |
| 21 | DT | ME   | 20 | DC | H5   | 3.06 | 4.51 |
| 21 | DT | ME   | 21 | DT | H1'  | 3.46 | 6.04 |
| 21 | DT | ME   | 21 | DT | H2'' | 3.21 | 6.23 |
| 21 | DT | ME   | 21 | DT | H2'  | 3.18 | 4.88 |
| 21 | DT | ME   | 21 | DT | H3'  | 4.81 | 6.28 |
| 21 | DT | ME   | 21 | DT | H6   | 2.78 | 3.47 |
| 22 | DC | H1'  | 4  | DA | H2   | 3.12 | 3.93 |
| 22 | DC | H2'' | 22 | DC | H1'  | 1.68 | 2.15 |
| 22 | DC | H2'  | 22 | DC | H1'  | 2.40 | 4.24 |
| 22 | DC | H3'  | 21 | DT | H1'  | 3.12 | 5.54 |
| 22 | DC | H3'  | 22 | DC | H1'  | 3.38 | 5.15 |
| 22 | DC | H3'  | 22 | DC | H2'' | 2.28 | 3.51 |

|    |    |      |    |    |      |      |      |
|----|----|------|----|----|------|------|------|
| 22 | DC | H3'  | 22 | DC | H2'  | 2.21 | 2.84 |
| 22 | DC | H6   | 21 | DT | H1'  | 2.35 | 3.71 |
| 22 | DC | H6   | 21 | DT | H2'' | 1.99 | 3.18 |
| 22 | DC | H6   | 21 | DT | H2'  | 3.12 | 4.51 |
| 22 | DC | H6   | 21 | DT | H3'  | 2.89 | 6.19 |
| 22 | DC | H6   | 21 | DT | H6   | 2.57 | 3.70 |
| 22 | DC | H6   | 22 | DC | H1'  | 2.99 | 5.16 |
| 22 | DC | H6   | 22 | DC | H2'  | 1.93 | 2.42 |
| 22 | DC | H6   | 22 | DC | H3'  | 2.98 | 4.12 |
| 22 | DC | H5   | 21 | DT | H1'  | 3.32 | 5.00 |
| 22 | DC | H5   | 21 | DT | H2'' | 2.69 | 3.63 |
| 22 | DC | H5   | 21 | DT | H2'  | 2.98 | 4.48 |
| 22 | DC | H5   | 21 | DT | H3'  | 3.09 | 4.05 |
| 22 | DC | H5   | 21 | DT | H6   | 3.06 | 3.64 |
| 22 | DC | H5   | 21 | DT | ME   | 3.30 | 4.10 |
| 22 | DC | H5   | 22 | DC | H1'  | 3.53 | 6.13 |
| 22 | DC | H5   | 22 | DC | H2'  | 2.92 | 4.55 |
| 22 | DC | H5   | 22 | DC | H3'  | 3.48 | 4.82 |
| 23 | DT | H1'  | 2  | DA | H2   | 3.81 | 5.41 |
| 23 | DT | H2'' | 23 | DT | H1'  | 1.8  | 2.72 |
| 23 | DT | H2'  | 23 | DT | H1'  | 2.52 | 3.95 |
| 23 | DT | H3'  | 22 | DC | H1'  | 3.02 | 5.40 |
| 23 | DT | H3'  | 23 | DT | H1'  | 2.26 | 4.10 |
| 23 | DT | H3'  | 23 | DT | H2'' | 2.16 | 2.74 |
| 23 | DT | H3'  | 23 | DT | H2'  | 1.93 | 2.44 |
| 23 | DT | H6   | 22 | DC | H1'  | 2.49 | 3.25 |
| 23 | DT | H6   | 22 | DC | H3'  | 3.09 | 3.98 |

|    |     |     |    |     |      |      |      |
|----|-----|-----|----|-----|------|------|------|
| 23 | DT  | H6  | 23 | DT  | H1'  | 2.00 | 2.97 |
| 23 | DT  | H6  | 23 | DT  | H2'' | 1.81 | 2.50 |
| 23 | DT  | H6  | 23 | DT  | H2'  | 2.25 | 3.50 |
| 23 | DT  | H6  | 23 | DT  | H3'  | 2.01 | 2.81 |
| 23 | DT  | ME  | 22 | DC  | H1'  | 3.27 | 5.05 |
| 23 | DT  | ME  | 22 | DC  | H3'  | 3.72 | 5.40 |
| 23 | DT  | ME  | 22 | DC  | H6   | 3.29 | 6.31 |
| 23 | DT  | ME  | 22 | DC  | H5   | 2.89 | 3.77 |
| 23 | DT  | ME  | 23 | DT  | H1'  | 2.75 | 5.05 |
| 23 | DT  | ME  | 23 | DT  | H2'' | 2.80 | 4.82 |
| 23 | DT  | ME  | 23 | DT  | H2'  | 3.25 | 5.48 |
| 23 | DT  | ME  | 23 | DT  | H3'  | 3.15 | 5.18 |
| 23 | DT  | ME  | 23 | DT  | H6   | 2.56 | 2.91 |
| 24 | DC3 | H1' | 2  | DA  | H2   | 3.88 | 5.45 |
| 24 | DC3 | H2' | 24 | DC3 | H1'  | 1.69 | 2.37 |
| 24 | DC3 | H3' | 24 | DC3 | H1'  | 3.88 | 5.03 |
| 24 | DC3 | H3' | 24 | DC3 | H2'  | 1.82 | 2.41 |
| 24 | DC3 | H6  | 23 | DT  | H1'  | 2.81 | 5.23 |
| 24 | DC3 | H6  | 23 | DT  | H2'  | 2.12 | 3.92 |
| 24 | DC3 | H6  | 23 | DT  | H3'  | 2.00 | 2.45 |
| 24 | DC3 | H6  | 23 | DT  | H6   | 2.23 | 3.75 |
| 24 | DC3 | H6  | 24 | DC3 | H1'  | 3.52 | 5.20 |
| 24 | DC3 | H6  | 24 | DC3 | H2'  | 1.72 | 2.47 |
| 24 | DC3 | H6  | 24 | DC3 | H3'  | 2.55 | 3.11 |
| 24 | DC3 | H5  | 23 | DT  | H2'  | 2.39 | 3.20 |
| 24 | DC3 | H5  | 23 | DT  | H3'  | 3.34 | 6.34 |
| 24 | DC3 | H5  | 23 | DT  | ME   | 3.66 | 5.40 |

|    |     |    |    |     |     |      |      |
|----|-----|----|----|-----|-----|------|------|
| 24 | DC3 | H5 | 24 | DC3 | H1' | 3.24 | 5.82 |
| 24 | DC3 | H5 | 24 | DC3 | H2' | 2.85 | 4.98 |
| 24 | DC3 | H5 | 24 | DC3 | H3' | 3.34 | 6.59 |

**Table S3.** Backbone restraints generated for OL-1b duplex used in rMD caluations.

|    |      |       |      |     |
|----|------|-------|------|-----|
| 2  | DA   | ALPHA | -90  | -30 |
| 3  | DG   | ALPHA | -90  | -30 |
| 4  | DA   | ALPHA | -90  | -30 |
| 5  | AMG  | ALPHA | -120 | 0   |
| 6  | DC   | ALPHA | -90  | -30 |
| 7  | DG   | ALPHA | -90  | -30 |
| 8  | DC   | ALPHA | -90  | -30 |
| 9  | DT   | ALPHA | -90  | -30 |
| 10 | DC   | ALPHA | -90  | -30 |
| 11 | DT   | ALPHA | -90  | -30 |
| 14 | DA   | ALPHA | -90  | -30 |
| 15 | DG   | ALPHA | -90  | -30 |
| 16 | DA   | ALPHA | -90  | -30 |
| 17 | AMG  | ALPHA | -120 | 0   |
| 18 | DC   | ALPHA | -90  | -30 |
| 19 | DG   | ALPHA | -90  | -30 |
| 20 | DC   | ALPHA | -90  | -30 |
| 21 | DT   | ALPHA | -90  | -30 |
| 22 | DC A | LPHA  | -90  | -30 |
| 23 | DT A | LPHA  | -90  | -30 |
| 2  | DA   | BETA  | 150  | 210 |
| 3  | DG   | BETA  | 150  | 210 |
| 4  | DA   | BETA  | 150  | 210 |
| 5  | AMG  | BETA  | 120  | 240 |
| 6  | DC   | BETA  | 150  | 210 |

|    |     |       |     |     |
|----|-----|-------|-----|-----|
| 7  | DG  | BETA  | 150 | 210 |
| 8  | DC  | BETA  | 150 | 210 |
| 9  | DT  | BETA  | 150 | 210 |
| 10 | DC  | BETA  | 150 | 210 |
| 11 | DT  | BETA  | 150 | 210 |
| 14 | DA  | BETA  | 150 | 210 |
| 15 | DG  | BETA  | 150 | 210 |
| 16 | DA  | BETA  | 150 | 210 |
| 17 | AMG | BETA  | 120 | 240 |
| 18 | DC  | BETA  | 150 | 210 |
| 19 | DG  | BETA  | 150 | 210 |
| 20 | DC  | BETA  | 150 | 210 |
| 21 | DT  | BETA  | 150 | 210 |
| 22 | DC  | BETA  | 150 | 210 |
| 23 | DT  | BETA  | 150 | 210 |
| 2  | DA  | GAMMA | 30  | 90  |
| 3  | DG  | GAMMA | 30  | 90  |
| 4  | DA  | GAMMA | 30  | 90  |
| 5  | AMG | GAMMA | 0   | 120 |
| 6  | DC  | GAMMA | 30  | 90  |
| 7  | DG  | GAMMA | 30  | 90  |
| 8  | DC  | GAMMA | 30  | 90  |
| 9  | DT  | GAMMA | 30  | 90  |
| 10 | DC  | GAMMA | 30  | 90  |
| 11 | DT  | GAMMA | 30  | 90  |
| 14 | DA  | GAMMA | 30  | 90  |
| 15 | DG  | GAMMA | 30  | 90  |

|    |     |        |     |     |
|----|-----|--------|-----|-----|
| 16 | DA  | GAMMA  | 30  | 90  |
| 17 | AMG | GAMMA  | 0   | 120 |
| 18 | DC  | GAMMA  | 30  | 90  |
| 19 | DG  | GAMMA  | 30  | 90  |
| 20 | DC  | GAMMA  | 30  | 90  |
| 21 | DT  | GAMMA  | 30  | 90  |
| 22 | DC  | GAMMA  | 30  | 90  |
| 23 | DT  | GAMMA  | 30  | 90  |
| 2  | DA  | EPSILN | 165 | 225 |
| 3  | DG  | EPSILN | 165 | 225 |
| 4  | DA  | EPSILN | 165 | 225 |
| 5  | AMG | EPSILN | 135 | 225 |
| 6  | DC  | EPSILN | 165 | 225 |
| 7  | DG  | EPSILN | 165 | 225 |
| 8  | DC  | EPSILN | 165 | 225 |
| 9  | DT  | EPSILN | 165 | 225 |
| 10 | DC  | EPSILN | 165 | 225 |
| 11 | DT  | EPSILN | 165 | 225 |
| 14 | DA  | EPSILN | 165 | 225 |
| 15 | DG  | EPSILN | 165 | 225 |
| 16 | DA  | EPSILN | 165 | 225 |
| 17 | AMG | EPSILN | 135 | 225 |
| 18 | DC  | EPSILN | 165 | 225 |
| 19 | DG  | EPSILN | 165 | 225 |
| 20 | DC  | EPSILN | 165 | 225 |
| 21 | DT  | EPSILN | 165 | 225 |
| 22 | DC  | EPSILN | 165 | 225 |



|    |     |        |      |     |
|----|-----|--------|------|-----|
| 23 | DT  | EPSILN | 165  | 225 |
| 2  | DA  | ZETA   | -135 | -75 |
| 3  | DG  | ZETA   | -135 | -75 |
| 4  | DA  | ZETA   | -135 | -75 |
| 5  | AMG | ZETA   | -165 | -45 |
| 6  | DC  | ZETA   | -135 | -75 |
| 7  | DG  | ZETA   | -135 | -75 |
| 8  | DC  | ZETA   | -135 | -75 |
| 9  | DT  | ZETA   | -135 | -75 |
| 10 | DC  | ZETA   | -135 | -75 |
| 11 | DT  | ZETA   | -135 | -75 |
| 14 | DA  | ZETA   | -135 | -75 |
| 15 | DG  | ZETA   | -135 | -75 |
| 16 | DA  | ZETA   | -135 | -75 |
| 17 | AMG | ZETA   | -165 | -45 |
| 18 | DC  | ZETA   | -135 | -75 |
| 19 | DG  | ZETA   | -135 | -75 |
| 20 | DC  | ZETA   | -135 | -75 |
| 21 | DT  | ZETA   | -135 | -75 |
| 22 | DC  | ZETA   | -135 | -75 |
| 23 | DT  | ZETA   | -135 | -75 |

**Table S4.** Deoxyribose torsion angles restraints generated for OL-1b used in rMD calculation.

|    |    |     |     |     |
|----|----|-----|-----|-----|
| 2  | DA | PPA | 100 | 165 |
| 3  | DG | PPA | 125 | 165 |
| 4  | DA | PPA | 125 | 165 |
| 5  | DG | PPA | 125 | 165 |
| 6  | DC | PPA | 90  | 130 |
| 7  | DG | PPA | 125 | 165 |
| 8  | DC | PPA | 90  | 130 |
| 9  | DT | PPA | 90  | 130 |
| 10 | DC | PPA | 90  | 130 |
| 11 | DT | PPA | 100 | 165 |
| 14 | DA | PPA | 100 | 165 |
| 15 | DG | PPA | 125 | 165 |
| 16 | DA | PPA | 125 | 165 |
| 17 | DG | PPA | 125 | 165 |
| 18 | DC | PPA | 90  | 130 |
| 19 | DG | PPA | 125 | 165 |
| 20 | DC | PPA | 90  | 130 |
| 21 | DT | PPA | 90  | 130 |
| 22 | DC | PPA | 90  | 130 |
| 23 | DT | PPA | 100 | 165 |

**Table S5.** Base pair restraints generated for OL-1b used in rMD calculations.

|   |     |     |    |     |     |      |      |
|---|-----|-----|----|-----|-----|------|------|
| 1 | DG5 | H1  | 24 | DC3 | N3  | 1.84 | 2.04 |
| 1 | DG5 | H22 | 24 | DC3 | O2  | 1.75 | 1.95 |
| 1 | DG5 | N1  | 24 | DC3 | N3  | 2.85 | 3.05 |
| 1 | DG5 | O6  | 24 | DC3 | H42 | 1.8  | 2    |
| 1 | DG5 | O6  | 24 | DC3 | N4  | 2.81 | 3.01 |
| 2 | DA  | H61 | 23 | DT  | O4  | 1.84 | 2.04 |
| 2 | DA  | N1  | 23 | DT  | H3  | 1.71 | 1.91 |
| 2 | DA  | N1  | 23 | DT  | N3  | 2.72 | 2.92 |
| 3 | DG  | H1  | 22 | DC  | N3  | 1.84 | 2.04 |
| 3 | DG  | H22 | 22 | DC  | O2  | 1.75 | 1.95 |
| 3 | DG  | N1  | 22 | DC  | N3  | 2.85 | 3.05 |
| 3 | DG  | O6  | 22 | DC  | H42 | 1.8  | 2    |
| 3 | DG  | O6  | 22 | DC  | N4  | 2.81 | 3.01 |
| 4 | DA  | H61 | 21 | DT  | O4  | 1.84 | 2.04 |
| 4 | DA  | N1  | 21 | DT  | H3  | 1.71 | 1.91 |
| 4 | DA  | N1  | 21 | DT  | N3  | 2.72 | 2.92 |
| 5 | AMG | H1  | 20 | DC  | N3  | 1.84 | 2.04 |
| 5 | AMG | H22 | 20 | DC  | O2  | 1.75 | 1.95 |
| 5 | AMG | N1  | 20 | DC  | N3  | 2.85 | 3.05 |
| 5 | AMG | O6  | 20 | DC  | H42 | 1.8  | 2    |
| 5 | AMG | O6  | 20 | DC  | N4  | 2.81 | 3.01 |
| 6 | DC  | H42 | 19 | DG  | O6  | 1.8  | 2    |
| 6 | DC  | N3  | 19 | DG  | H1  | 1.84 | 2.04 |
| 6 | DC  | N3  | 19 | DG  | N1  | 2.85 | 3.05 |
| 6 | DC  | N4  | 19 | DG  | O6  | 2.81 | 3.01 |

|    |     |     |    |     |     |      |      |
|----|-----|-----|----|-----|-----|------|------|
| 6  | DC  | O2  | 19 | DG  | H22 | 1.75 | 1.95 |
| 7  | DG  | H1  | 18 | DC  | N3  | 1.84 | 2.04 |
| 7  | DG  | H22 | 18 | DC  | O2  | 1.75 | 1.95 |
| 7  | DG  | N1  | 18 | DC  | N3  | 2.85 | 3.05 |
| 7  | DG  | O6  | 18 | DC  | H42 | 1.8  | 2    |
| 7  | DG  | O6  | 18 | DC  | N4  | 2.81 | 3.01 |
| 8  | DC  | H42 | 17 | AMG | O6  | 1.8  | 2    |
| 8  | DC  | N3  | 17 | AMG | H1  | 1.84 | 2.04 |
| 8  | DC  | N3  | 17 | AMG | N1  | 2.85 | 3.05 |
| 8  | DC  | N4  | 17 | AMG | O6  | 2.81 | 3.01 |
| 8  | DC  | O2  | 17 | AMG | H22 | 1.75 | 1.95 |
| 9  | DT  | H3  | 16 | DA  | N1  | 1.71 | 1.91 |
| 9  | DT  | N3  | 16 | DA  | N1  | 2.72 | 2.92 |
| 9  | DT  | O4  | 16 | DA  | H61 | 1.84 | 2.04 |
| 10 | DC  | H42 | 15 | DG  | O6  | 1.8  | 2    |
| 10 | DC  | N3  | 15 | DG  | H1  | 1.84 | 2.04 |
| 10 | DC  | N3  | 15 | DG  | N1  | 2.85 | 3.05 |
| 10 | DC  | N4  | 15 | DG  | O6  | 2.81 | 3.01 |
| 10 | DC  | O2  | 15 | DG  | H22 | 1.75 | 1.95 |
| 11 | DT  | H3  | 14 | DA  | N1  | 1.71 | 1.91 |
| 11 | DT  | N3  | 14 | DA  | N1  | 2.72 | 2.92 |
| 11 | DT  | O4  | 14 | DA  | H61 | 1.84 | 2.04 |
| 12 | DC3 | H42 | 13 | DG5 | O6  | 1.8  | 2    |
| 12 | DC3 | N3  | 13 | DG5 | H1  | 1.84 | 2.04 |
| 12 | DC3 | N3  | 13 | DG5 | N1  | 2.85 | 3.05 |
| 12 | DC3 | N4  | 13 | DG5 | O6  | 2.81 | 3.01 |
| 12 | DC3 | O2  | 13 | DG5 | H22 | 1.75 | 1.95 |

**Table S6.** Helicoidal analysis for the OL-1b duplex carried out with the program Curves+ (43).

| Base pair                       | Shift (Å) | Slide (Å) | Rise (Å) | Tilt (°) | Roll (°) | Twist (°) | Buckle (°) | Propel (°) | Opening (°) |
|---------------------------------|-----------|-----------|----------|----------|----------|-----------|------------|------------|-------------|
| G <sup>1</sup> :C <sup>12</sup> | 0.26      | -0.60     | 3.14     | -3.7     | -0.1     | 30.0      | -0.9       | -9.1       | 2.4         |
| A <sup>2</sup> :T <sup>11</sup> | -0.98     | -0.76     | 3.32     | -0.8     | 6.8      | 31.1      | 9.0        | -17.1      | 4.5         |
| G <sup>3</sup> :C <sup>10</sup> | -0.78     | -0.22     | 3.41     | 0.8      | 12.6     | 35.2      | 4.5        | -7.8       | -0.8        |
| A <sup>4</sup> :T <sup>9</sup>  | 0.05      | -0.53     | 3.31     | -5.7     | 1.4      | 31.3      | -0.5       | -16        | -0.5        |
| X <sup>5</sup> :C <sup>8</sup>  | 0.09      | -0.36     | 3.19     | 1.6      | 1.2      | 37.1      | -6.3       | -14.2      | 1.4         |
| C <sup>6</sup> :G <sup>7</sup>  | 0.11      | -0.49     | 3.16     | 0.3      | 6.8      | 32.0      | -0.7       | -8.6       | 0.4         |
| G <sup>7</sup> :C <sup>6</sup>  | -0.09     | -0.41     | 3.23     | -0.9     | 1.2      | 37.0      | 1.3        | -9.5       | 0.3         |
| C <sup>8</sup> :X <sup>5</sup>  | -0.02     | -0.53     | 3.34     | 5.3      | 1.9      | 31.6      | 5.9        | -15        | 1.2         |
| T <sup>9</sup> :A <sup>4</sup>  | 0.74      | -0.24     | 3.37     | -0.9     | 12.2     | 34.8      | -0.5       | -16.2      | -0.2        |
| C <sup>10</sup> :G <sup>3</sup> | 0.99      | -0.81     | 3.32     | 1.0      | 6.3      | 31.1      | -4.1       | -7.3       | -1.0        |
| T <sup>11</sup> :A <sup>2</sup> | -0.21     | -0.60     | 3.12     | 3.8      | -0.2     | 30.2      | -8.6       | -16.9      | 4.0         |
| C <sup>12</sup> :G <sup>1</sup> |           |           |          |          |          |           | 1.6        | -10.1      | 2.4         |

**Table S7.** Backbone torsion angles of the refined OL-1b duplex, calculated from the program Curves+ (44). Values are averaged from two symmetry-related strands.

| Base pair                       | Alpha<br>(°) | Beta<br>(°) | Gamma<br>(°) | Delta<br>(°) | Epsilon<br>(°) | Zeta<br>(°) |
|---------------------------------|--------------|-------------|--------------|--------------|----------------|-------------|
| G <sup>1</sup> :C <sup>12</sup> |              |             | 51.0         | 142.9        | -174.3         | -81.7       |
| A <sup>2</sup> :T <sup>11</sup> | -67.8        | 170.7       | 56.7         | 108.3        | -173.3         | -97.3       |
| G <sup>3</sup> :C <sup>10</sup> | -67.1        | 178.7       | 48.9         | 135.3        | -174.6         | -106.5      |
| A <sup>4</sup> :T <sup>9</sup>  | -70.0        | -168.9      | 44.9         | 137.7        | 176.5          | -98.5       |
| X <sup>5</sup> :C <sup>8</sup>  | -65.7        | 170.7       | 58.3         | 113.9        | -172.3         | -87.8       |
| C <sup>6</sup> :G <sup>7</sup>  | -65.7        | 174.4       | 55.2         | 119.6        | -175.2         | -95.2       |
| G <sup>7</sup> :C <sup>6</sup>  | -65.8        | 175.6       | 53.3         | 121.8        | -175.2         | -95.4       |
| C <sup>8</sup> :X <sup>5</sup>  | -68.0        | 170.5       | 58.4         | 104.1        | -176.9         | -84.6       |
| T <sup>9</sup> :A <sup>4</sup>  | -63.5        | 169.1       | 55.4         | 115.9        | -170.0         | -79.8       |
| C <sup>10</sup> :G <sup>3</sup> | -66.2        | 173.8       | 47.7         | 117.5        | -174.2         | -86.5       |
| T <sup>11</sup> :A <sup>2</sup> | -65.2        | 166.6       | 46.1         | 84.5         | -175.0         | -82.9       |
| C <sup>12</sup> :G <sup>1</sup> | -68.5        | 166.9       | 54.9         | 83.8         |                |             |

**Figure S1.** Backbone torsion angles of the refined OL-1b duplex calculated from the program Curves+ (44).

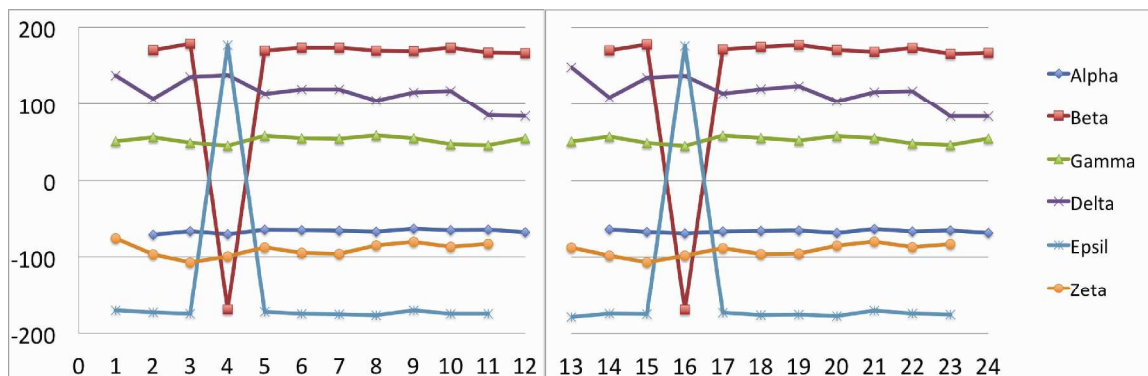

**Figure S2.** Linewidths of the guanine N1H and thymine N3H imino protons as a function of temperature. **A.** Unmodified OL-1a duplex. **B.** Modified OL-1b duplex.

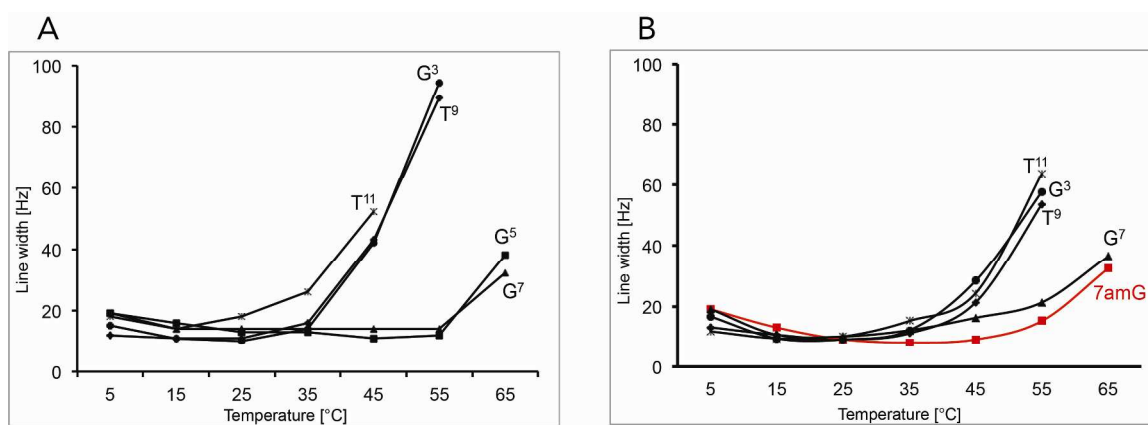



**Figure S3.** Representative time courses of transfer of solvent magnetization to the imino protons. **A.** The left panel shows base pair G<sup>3</sup>:C<sup>10</sup> in the OL-1a duplex and the right panel shows base pair G<sup>3</sup>:C<sup>10</sup> in the OL-1b duplex. **B.** The left panel shows base pair A<sup>4</sup>:T<sup>9</sup> in the OL-1a duplex and the right panel shows base pair A<sup>4</sup>:T<sup>9</sup> in the OL-1b duplex. **C.** The left panel shows base pair G<sup>5</sup>:C<sup>8</sup> in the OL-1a duplex and the right panel shows base pair X<sup>5</sup>:C<sup>8</sup> in the OL-1b duplex. **D.** The left panel shows base pair C<sup>6</sup>:G<sup>7</sup> in the OL-1a duplex and the right panel shows base pair C<sup>6</sup>:G<sup>7</sup> in the OL-1b duplex.

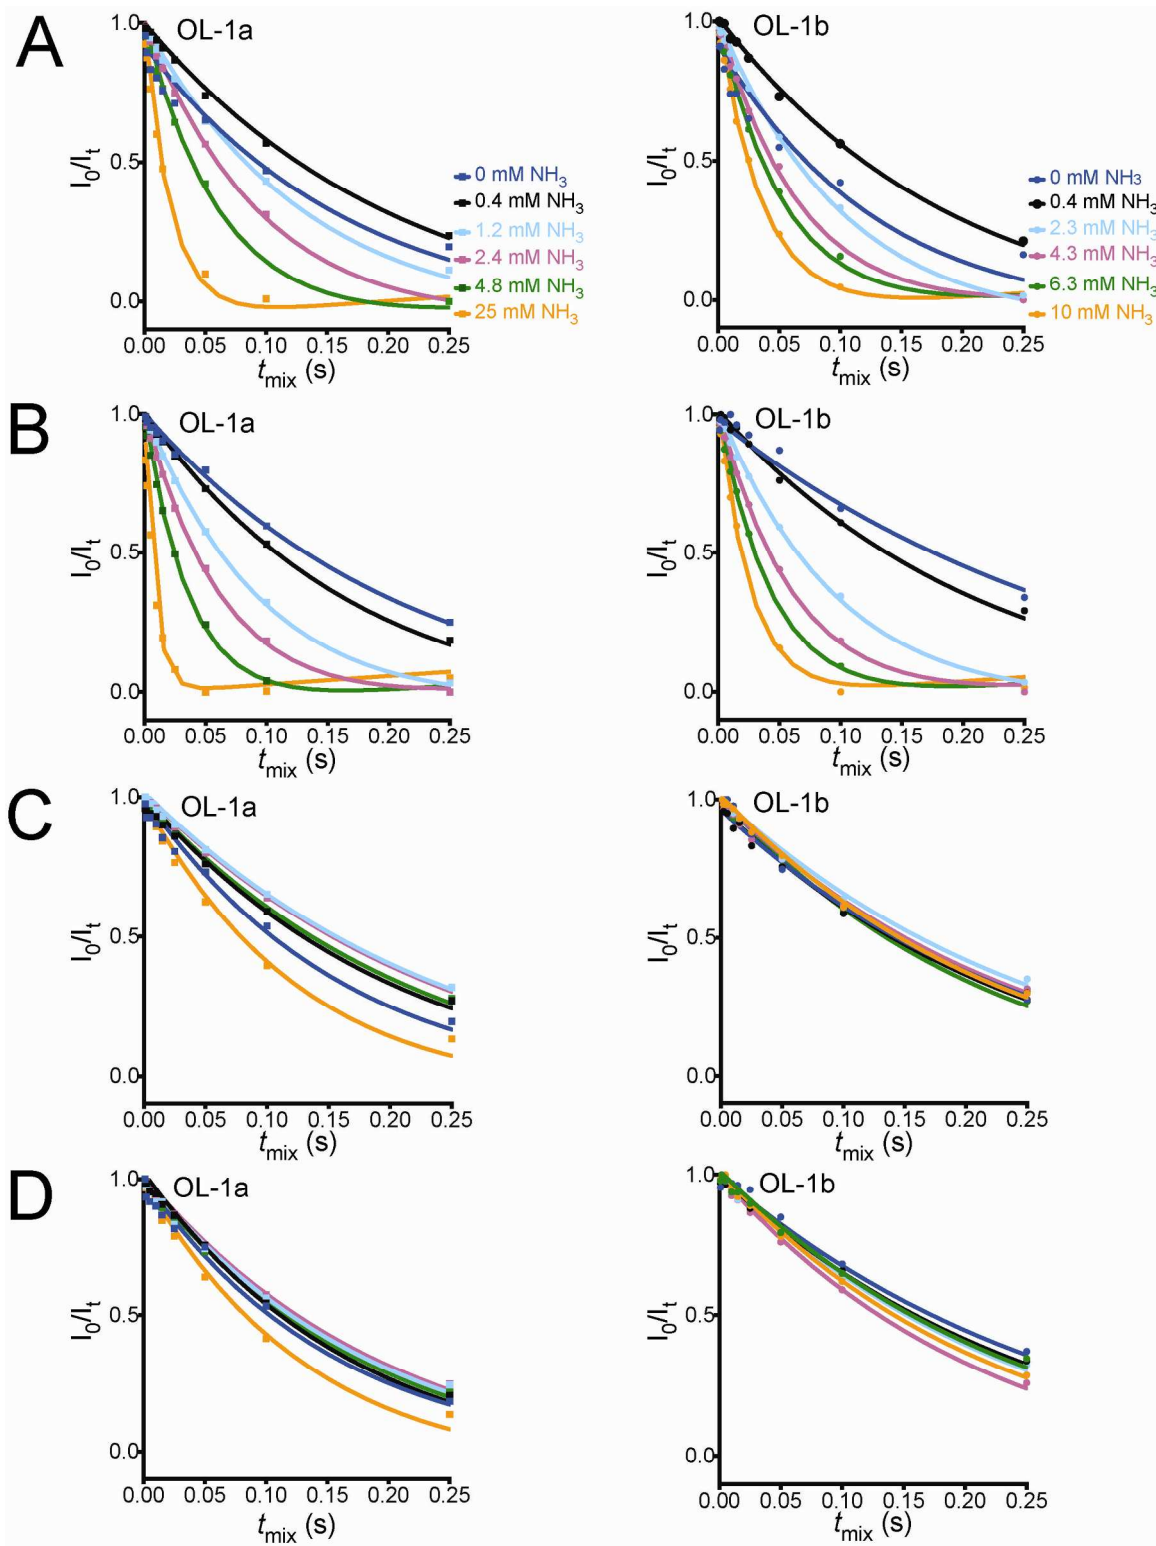

Supplement: bi400695r_si_001.pdf [file bi400695r_si_001.pdf]
